# Supplementary material for: Facile synthesis of wurtzite copper–zinc–tin sulfidenanocrystals from plasmonic djurleite nuclei
Source: Royal Society of Chemistry journal article supplement (doi:10.1039/c2ta00151a), 2012-10-18
Supplement: c2ta00151a.pdf [file c2ta00151a.pdf]

## Supplementary Information

# Facile Synthesis of Wurtzite Copper-Zinc-Tin-Sulfide Nanocrystals from Plasmonic Djurleite Nuclei

Hsueh-Chung Liao,<sup>a</sup> Meng-Huan Jao,<sup>a</sup> Jing-Jong Shyue,<sup>b</sup> Yang-Fang Chen<sup>c</sup> and Wei-Fang Su<sup>\*a</sup>

<sup>a</sup> No. 1, Sec. 4, Roosevelt Road, Department of Materials Science and Engineering, National Taiwan University, Taipei 10617, Taiwan  
Fax: +886 2 33664078; Tel: +886 2 33664078; E-mail: suwf@ntu.edu.tw

<sup>b</sup> No. 128, Academia Road, Section 2, Academia Sinica, Nankang, Taipei 115, Taiwan

<sup>c</sup> No. 1, Sec. 4, Roosevelt Road, Department of Physics, National Taiwan University, Taipei 10617, Taiwan

Simulation of XRD patterns of wurtzite CZTS

The simulation of w-CZTS XRD pattern was performed using Diamond 3.2 software with lattice constant  $a=7.638 \text{ \AA}$ ,  $b=6.6776 \text{ \AA}$  and  $c=6.3519 \text{ \AA}$  with space group of Pmn21 and crystal structure of orthorhombic. The crystal structure representation is shown in Figure S1 and the fractional atomic coordinates are listed in Table 1. The simulated XRD pattern is shown in Figure S2 with corresponding indexed 15 planes.

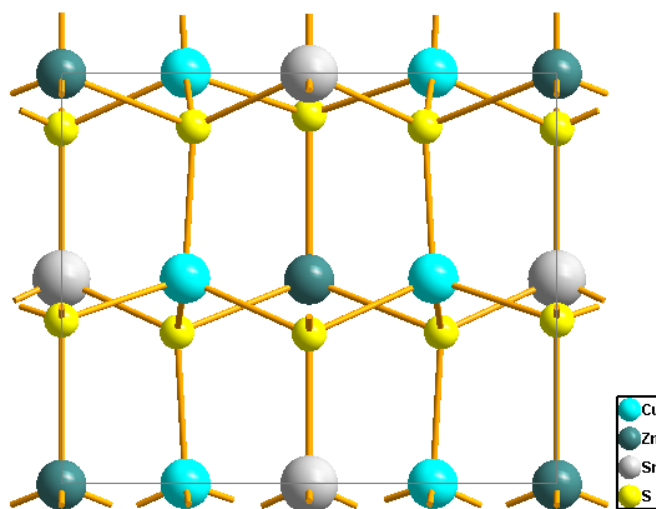

Fig. S1. Crystal structure representation of w-CZTS with Cu, Zn, Sn and S atoms respectively.

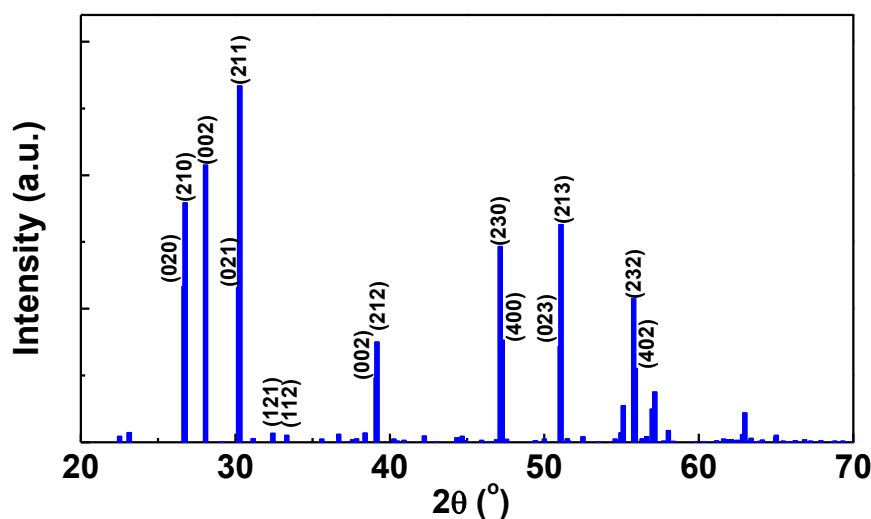

Fig. S2. Simulated XRD patterns of w-CZTS with indexed planes.

**Table S1.** Fractional atomic coordinates of respective elements of w-CZTS.

| Atom | x/a    | y/b    | z/c    |
|------|--------|--------|--------|
| Cu   | 0.2504 | 0.327  | 0      |
| Cu   | 0.7496 | 0.327  | 0      |
| Cu   | 0.2496 | 0.673  | 0.5    |
| Cu   | 0.7504 | 0.673  | 0.5    |
| Zn   | 0      | 0.8411 | 0.9971 |
| Zn   | 0.5    | 0.1589 | 0.4971 |
| Sn   | 0      | 0.1786 | 0.4982 |
| Sn   | 0.5    | 0.8214 | 0.9982 |
| S    | 0.2335 | 0.342  | 0.3688 |
| S    | 0.2665 | 0.658  | 0.8688 |
| S    | 0.7335 | 0.658  | 0.8688 |
| S    | 0.7665 | 0.342  | 0.3688 |
| S    | 0      | 0.2068 | 0.864  |
| S    | 0.5    | 0.7932 | 0.364  |
| S    | 0      | 0.848  | 0.398  |
| S    | 0.5    | 0.152  | 0.898  |
